# Supplementary material for: Supramolecular assembly-enabled homochiral polymerization of short (dA)n oligonucleotides
Source: Royal Society of Chemistry journal article supplement (doi:10.1039/d1cc05420a), 2021-01-01
Supplement: d1cc05420a1.pdf [file d1cc05420a1.pdf]

## Supporting Information

### **Supramolecular Assembly-Enabled Homochiral Polymerization of Short (dA)<sub>n</sub> Oligonucleotides**

Sreejith Mangalath, Suneesh C. Karunakaran, Gary Newnam, Gary B. Schuster, and Nicholas V. Hud\*

School of Chemistry and Biochemistry, Georgia Institute of Technology, 311 Ferst Drive, Atlanta, Georgia 30332-0400 (USA)

E-mail: [hud@chemistry.gatech.edu](mailto:hud@chemistry.gatech.edu)

## Materials and Methods

Oligonucleotides were purchased from IDT. Cyanuric acid, EDC, MES, HEPES and  $\text{MgCl}_2$  were purchased from Sigma Aldrich. beta-L-Pac-dA-CE Phosphoramidite was purchased from Glen Research. L-oligonucleotide and all the oligos with mismatches were synthesized inhouse using a standard DNA/RNA synthesizer.

**Construction of assembly:** 500  $\mu\text{M}$  of oligonucleotide (unless otherwise stated), Cyanuric acid (12.5 mM – 75 mM), 100 mM HEPES buffer (pH 6.8) and 10 mM  $\text{MgCl}_2$  were mixed and made up to 10  $\mu\text{L}$  by gentle heating to 80  $^\circ\text{C}$  for 5 min. The mixture is then allowed to cool to 4  $^\circ\text{C}$  for 15 min and used for analyses.

**Polymerization Reactions:** Samples for polymerization reactions were prepared by mixing oligonucleotide (500  $\mu\text{M}$ , unless otherwise stated) and Cyanuric acid (12.5 mM – 75 mM), 100 mM HEPES buffer (pH 6.8) and 10 mM  $\text{MgCl}_2$ . After 15 min equilibration at 4  $^\circ\text{C}$ , EDC (250 mM, from an  $\text{H}_2\text{O}$  stock) was added, and samples were incubated for 24 h (unless otherwise stated) at 4  $^\circ\text{C}$ .

**$^{32}\text{P}$  Post-labeling assay:** After reaction, a 1  $\mu\text{L}$  aliquot of reaction mixture was removed and treated with T4 polynucleotide kinase and  $[\gamma\text{-}^{32}\text{P}]$  ATP overnight, according to standard procedures. The  $^{32}\text{P}$  labelled redaction products were analyzed using 20% denaturing PAGE analysis.

**Ion exchange chromatography (HPLC) analysis of Reaction Products:** Reactions contained 500  $\mu\text{M}$  oligonucleotide, Cyanuric acid (12.5 mM – 75 mM), 10 mM  $\text{MgCl}_2$ , 100 mM HEPES buffer (pH 6.8), and 250 mM EDC. The reactions were incubated at 4  $^\circ\text{C}$ . At each time point, a 1  $\mu\text{L}$  aliquot was removed and diluted in 99  $\mu\text{L}$  25 mM EDTA and 25 mM tris buffer. The aliquot was then immediately chromatographed (ThermoFisher DNAPac 200 analytical column, ambient temperature). Gradient: Solvent A = 12.5 mM Tris buffer, pH 8. Solvent B = 12.5 mM Tris buffer + 1.5 M NaCl, pH 8. 0–15 min, 5% B. 15–25 min, 5–55% B. 25–30 min, 5% B.

**CD Analysis:** Circular dichroism (CD) spectra were collected using a JASCO 810 CD spectropolarimeter. Samples were contained within a strain free 0.1 mm quartz demountable cell (Starna).

**AFM Analysis:** AFM images were obtained with a Nanoscope IIIa (Digital Instruments) in tapping mode using Si tips (Vistaprobes, 48  $\text{Nm}^{-1}$ ) on freshly cleaved mica. The mica substrate was rinsed with water and dried under  $\text{N}_2$ . A 2  $\mu\text{L}$  sample of the assembly solution was spread over the mica using  $\text{N}_2$  flow and was dried with  $\text{N}_2$  gas. The average length and height of supramolecular polymers from AFM images were calculated using the image analysis software Image J (NIH).

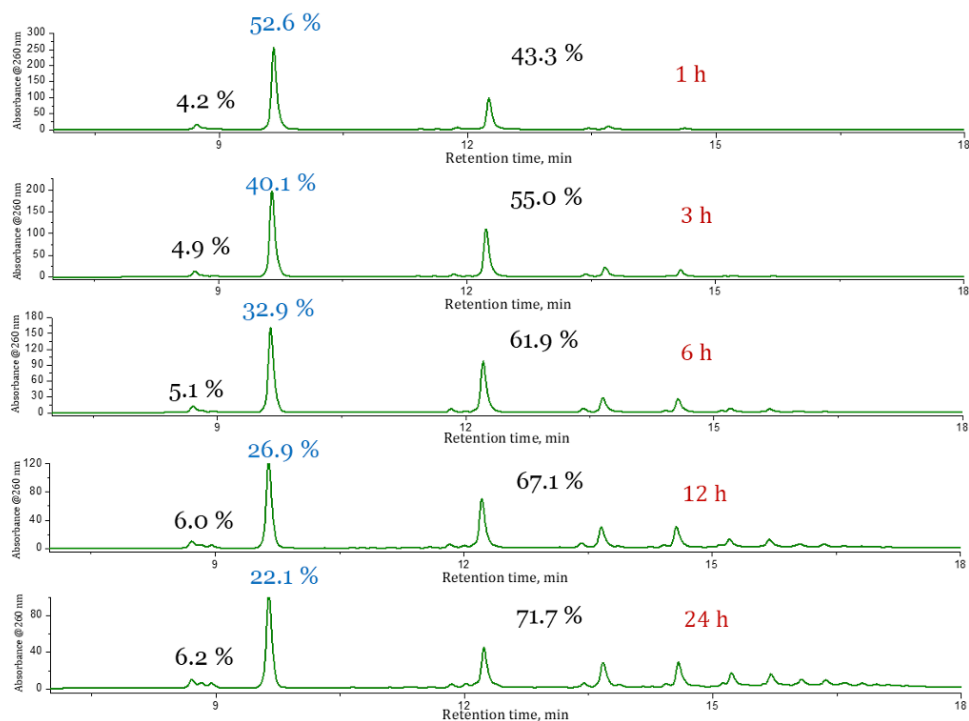

**Figure S1.** Ion exchange chromatograms of  $(dA)_5 3'p$ -CA (500  $\mu$ M, 25 mM CA, 100 mM HEPES, pH 6.8, 10 mM  $MgCl_2$ , 250 mM EDC, 4  $^{\circ}C$ ) polymerization reactions at various time intervals (1, 3, 6, 12 and 24 h).

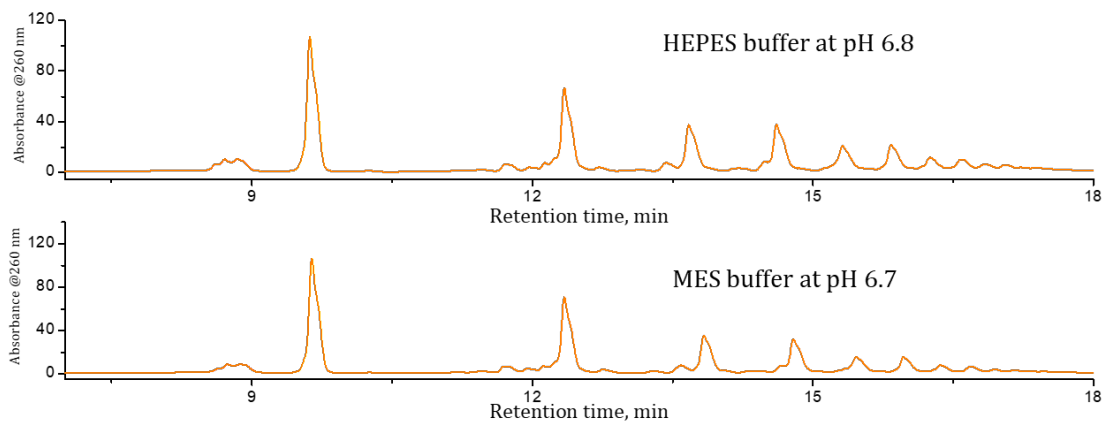

**Figure S2.** (a) Ion exchange chromatograms of  $(dA)_5$  - CA assembly (500  $\mu$ M  $(dA)_5 3'p$ , 25 mM CA, 10 mM  $MgCl_2$ , 250 mM EDC, 4  $^{\circ}C$ ) polymerization reactions in HEPES and MES buffer (100 mM, pH 6.7-6.8) after 24 h.

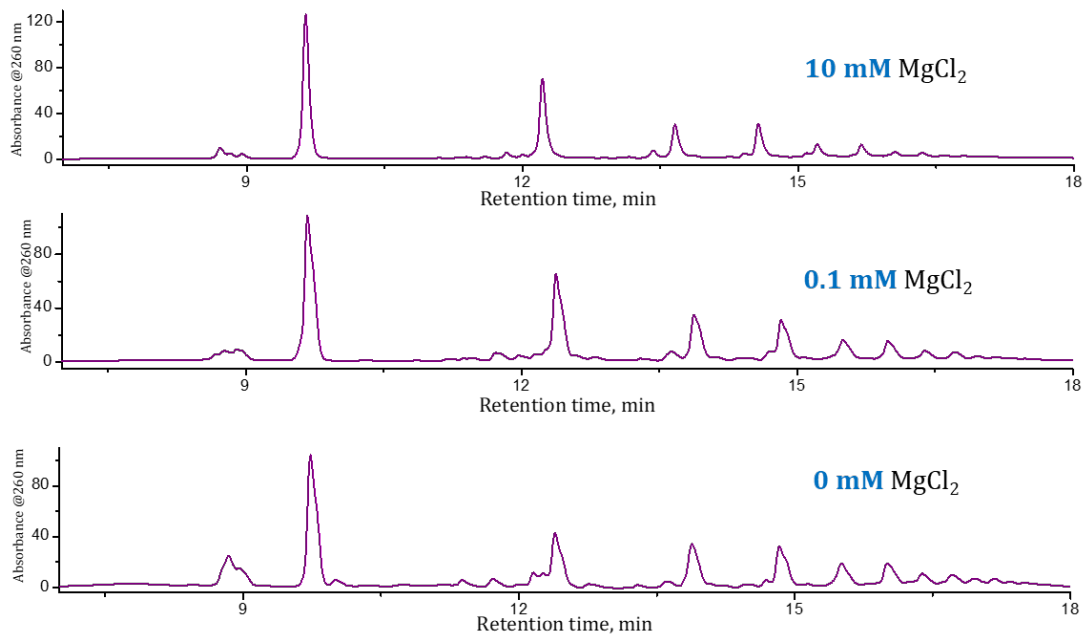

**Figure S3.** Ion exchange chromatograms of (dA)<sub>5</sub> – CA assembly (500 μM (dA)<sub>5</sub>3'p, 25 mM CA, 100 mM HEPES, pH 6.8, 250 mM EDC, 4 °C) polymerization reactions at various MgCl<sub>2</sub> concentrations (10 mM, 0.1 mM and 0 mM) after 24 h.

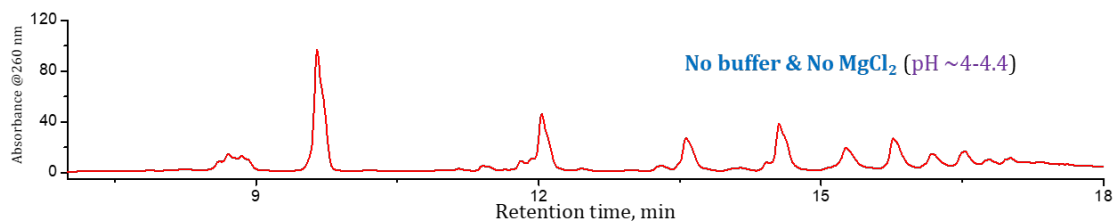

**Figure S4.** Ion exchange chromatograms of (dA)<sub>5</sub> – CA (500 μM (dA)<sub>5</sub>3'p, 25 mM CA, 10 mM MgCl<sub>2</sub>, 250 mM EDC, 4 °C) polymerization in aqueous solution (No buffer and MgCl<sub>2</sub>) after 24 h.

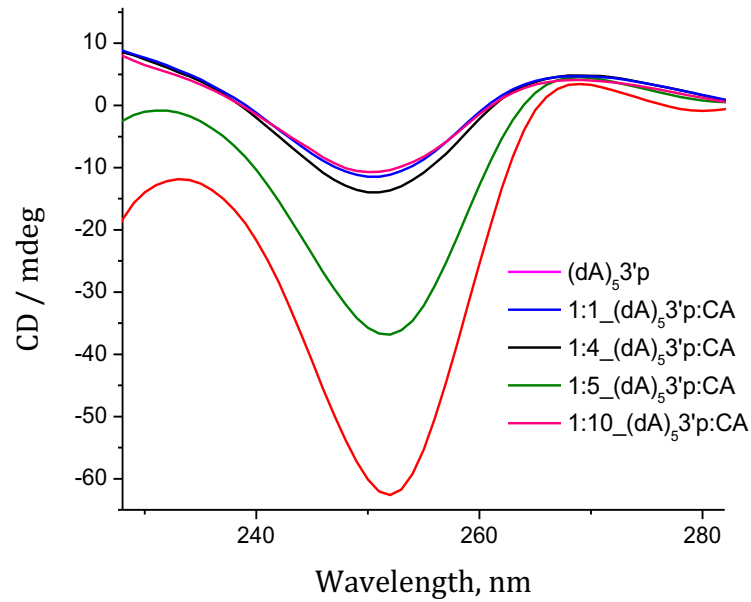

**Figure S5.** CD spectra of  $(dA)_5 - CA$  assemblies ( $500 \mu M (dA)_5 3'p$ ,  $100 \text{ mM HEPES}$ ,  $\text{pH } 6.8$ ,  $10 \text{ mM MgCl}_2$ ) with varying CA concentrations  $2.5 \text{ mM}$ ,  $10 \text{ mM}$ ,  $12.5 \text{ mM}$  and  $25 \text{ mM}$  ( $dA:CA = 1:1, 1:4, 1:5$  and  $1:10$ ) at  $4 \text{ }^\circ\text{C}$ .

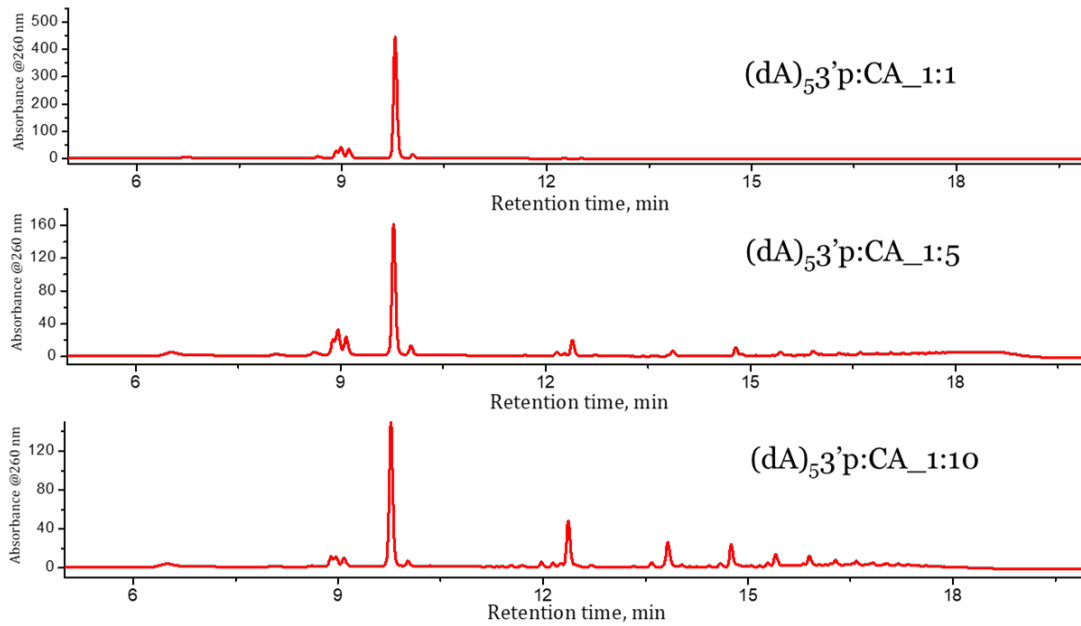

**Figure S6.** Ion exchange chromatograms of  $(dA)_5 3'p - CA$  assembly polymerization reactions at various CA concentrations-  $2.5 \text{ mM}$ ,  $12.5 \text{ mM}$  and  $25 \text{ mM}$  ( $dA:CA = 1:1, 1:5$  and  $1:10$ ) after  $24 \text{ h}$  ( $500 \mu M (dA)_5 3'p$ ,  $100 \text{ mM HEPES}$ ,  $\text{pH } 6.8$ ,  $250 \text{ mM EDC}$ ,  $4 \text{ }^\circ\text{C}$ ).

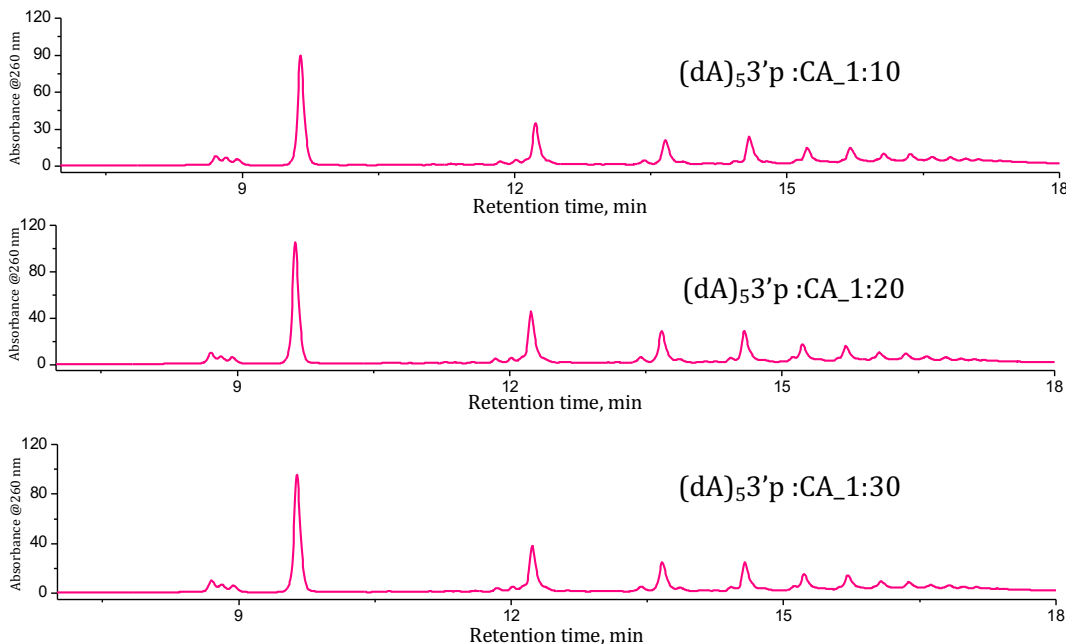

**Figure S7.** Ion exchange chromatograms of  $(dA)_5 3'p$  – CA assembly polymerization reactions at various CA concentrations- 25 mM, 50 mM and 75 mM ( $dA:CA = 1:10, 1:20$  and  $1:30$ ) after 24 h ( $500 \mu M (dA)_5 3'p$ , 10 mM  $MgCl_2$ , 100 mM HEPES, pH 6.8, 250 mM EDC,  $4^\circ C$ ).

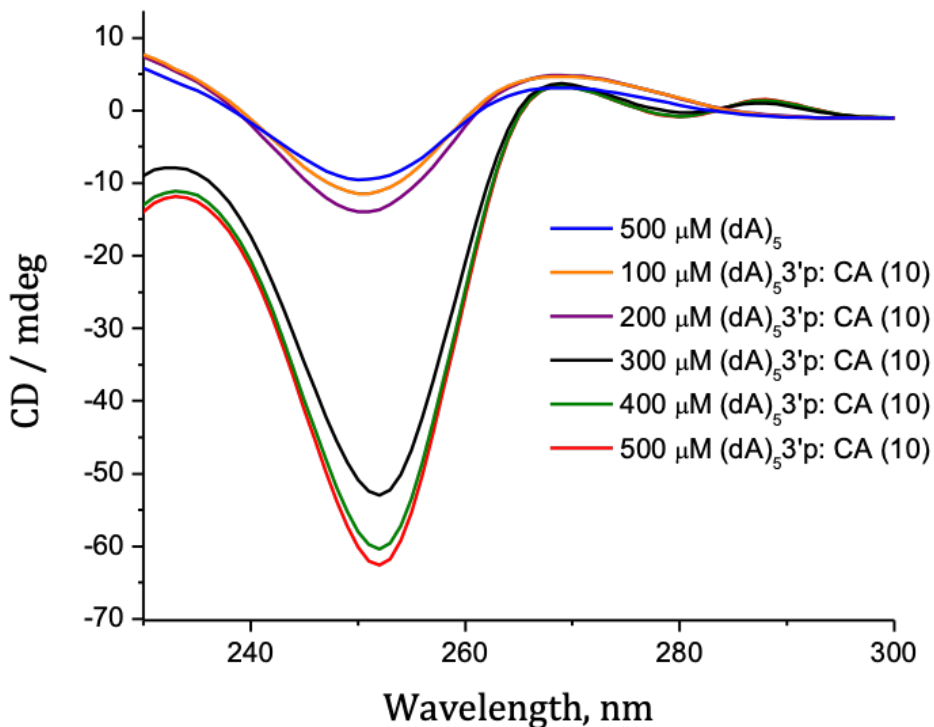

**Figure S8.** CD spectra of  $(dA)_5$  – CA assemblies with varying  $(dA)_5 3'p$  concentrations (100-500  $\mu M (dA)_5 3'p$ , 100 mM HEPES, pH 6.8, 10 mM  $MgCl_2$ ) with 5 – 25 mM CA ( $dA:CA = 1:10$ ) at  $4^\circ C$ .

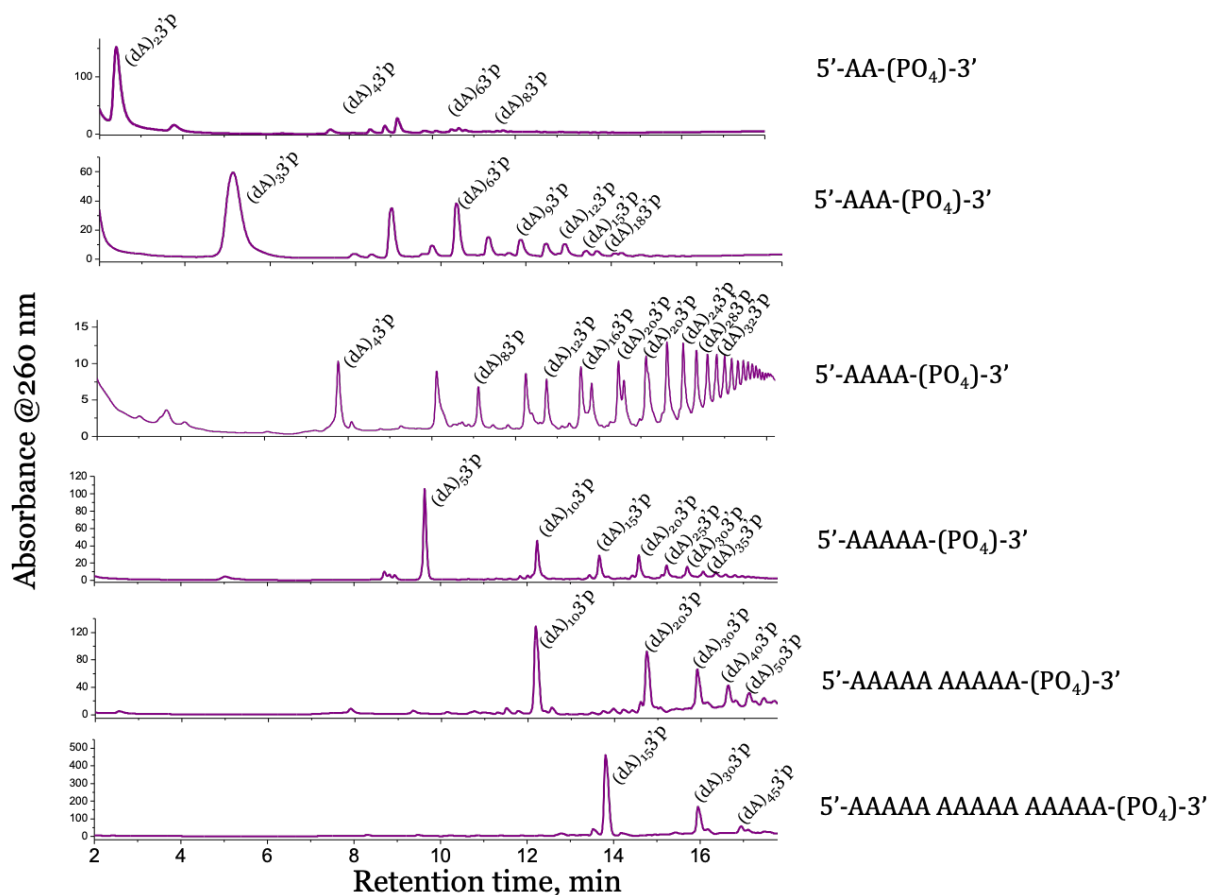

**Figure S9.** Ion exchange chromatograms of (dA)<sub>n</sub>3'p-CA polymerization reactions with change in oligomer length ((dA)<sub>2</sub>3'p -5 mM, (dA)<sub>3</sub>3'p -1 mM, (dA)<sub>4</sub>3'p -700 μM, (dA)<sub>5</sub>3'p -500 μM, (dA)<sub>10</sub>3'p -500 μM and (dA)<sub>15</sub>3'p -500 μM) with CA concentrations of 25-100 mM (dA:CA = 1:10) after 24 h (100 mM HEPES, pH 6.8, 250 mM EDC, 4 °C). The concentrations of (dA)<sub>n</sub>3'p, n>4 were fixed at 500 μM and higher concentrations of (dA)<sub>n</sub>3'p, n<5 were chosen to ensure formation of stable assembly.

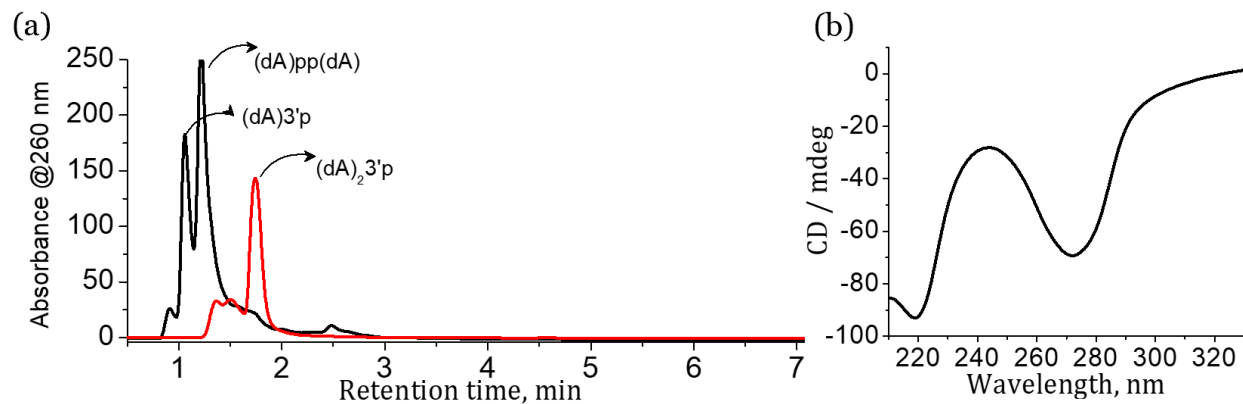

**Figure S10.** (a) Ion exchange chromatograms of (dA)<sub>3</sub>'p- CA assembly polymerization reaction (black trace) after 24 h (10 mM (dA)<sub>3</sub>'p, 100 mM CA, 100 mM HEPES, pH 6.8, 10 mM MgCl<sub>2</sub>, 250 mM EDC, 4 °C) plotted with pre-synthesized (dA)<sub>2</sub>3'p (red trace) for reference. (b) CD spectrum of (dA)<sub>3</sub>'p - CA assemblies (10 mM (dA)<sub>3</sub>'p, 100 mM CA, 100 mM HEPES, pH 6.8, 10 mM MgCl<sub>2</sub>, 4 °C).

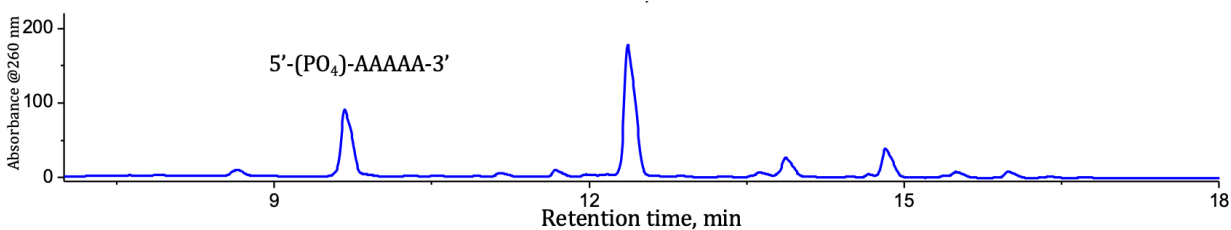

**Figure S11.** Ion exchange chromatograms of 5'p(dA)<sub>5</sub> - CA assembly polymerization reaction after 24 h (500 μM 5'p(dA)<sub>5</sub>, 25 mM CA, 100 mM HEPES, pH 6.8, 10 mM MgCl<sub>2</sub>, 250 mM EDC, 4 °C).

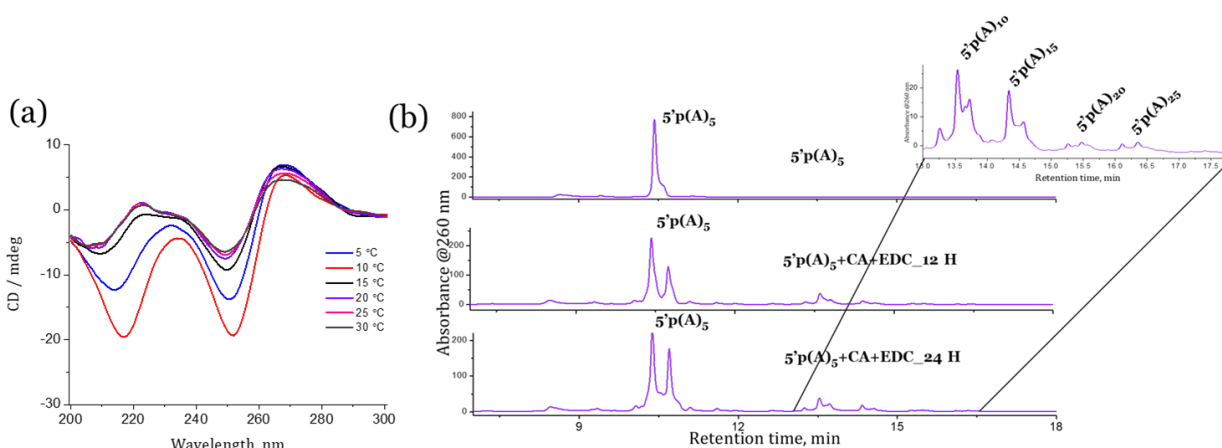

**Figure S12.** (a) Temperature dependent CD spectra of 5'p(A)<sub>5</sub>-CA assembly (500 μM 5'p(A)<sub>5</sub>, 100 mM HEPES, pH 6.8). (b) Ion exchange chromatograms of (A)<sub>5</sub>5'p and 5'p(A)<sub>5</sub>:CA polymerization reactions after 12 h and 24 h (500 μM 5'p(A)<sub>5</sub>, 25 mM CA, 100 mM HEPES, pH 6.8, 250 mM EDC, 4 °C).



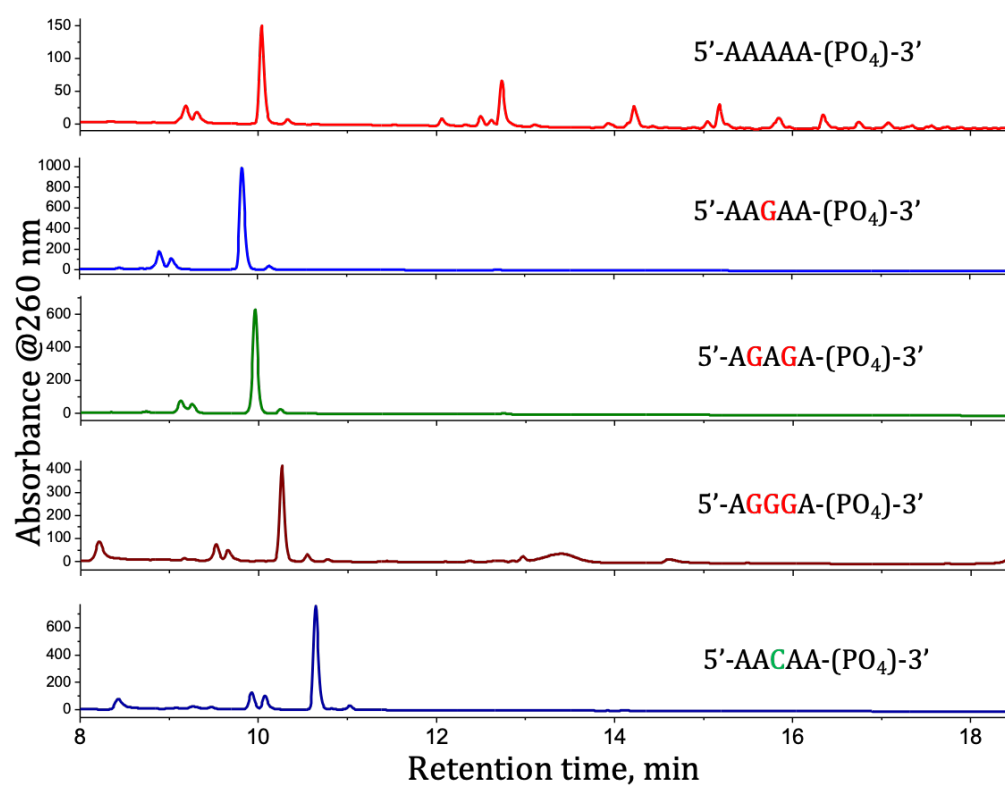

**Figure S13.** Ion exchange chromatograms of (dA)<sub>5</sub>3'p and (dA)<sub>5</sub>3'p with mismatches (G and C) polymerization reactions after 24 h (500 μM oligonucleotides, 25 mM CA, 100 mM HEPES, pH 6.8, 250 mM EDC, 4 °C).
